# Supplementary material for: Role of Klotho and AGE/RAGE-Wnt/β-Catenin Signalling Pathway on the Development of Cardiac and Renal Fibrosis in Diabetes
Source: MDPI journal article supplement (doi:10.3390/ijms24065241), 2023-03-09
Supplement: s1 [file s1]

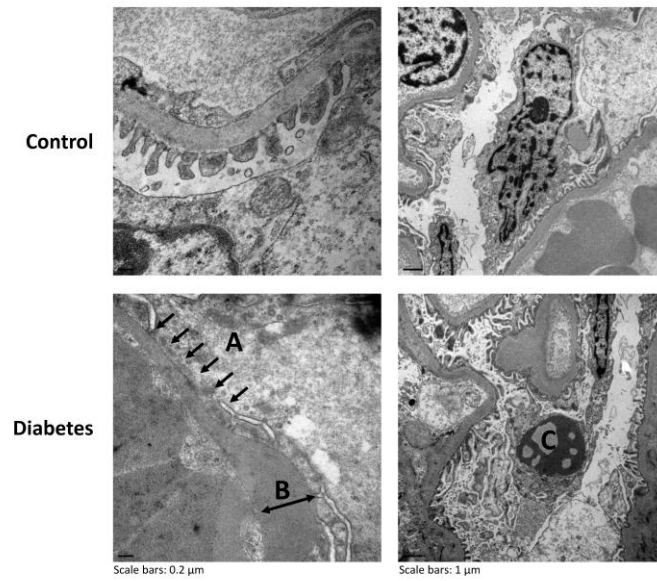

**Figure S2.** Electron microscope representative images of renal ultrastructure in control and diabetic rats. **(A)** Indicates podocyte foot process effacement. **(B)** Indicates diffuse thickening basement membrane. **(C)** Podocyte pyknotic nuclei.
