# Supplementary material for: Role of Klotho and AGE/RAGE-Wnt/β-Catenin Signalling Pathway on the Development of Cardiac and Renal Fibrosis in Diabetes
Source: MDPI journal article supplement (doi:10.3390/ijms24065241), 2023-03-09
Supplement: s1 [file s1]

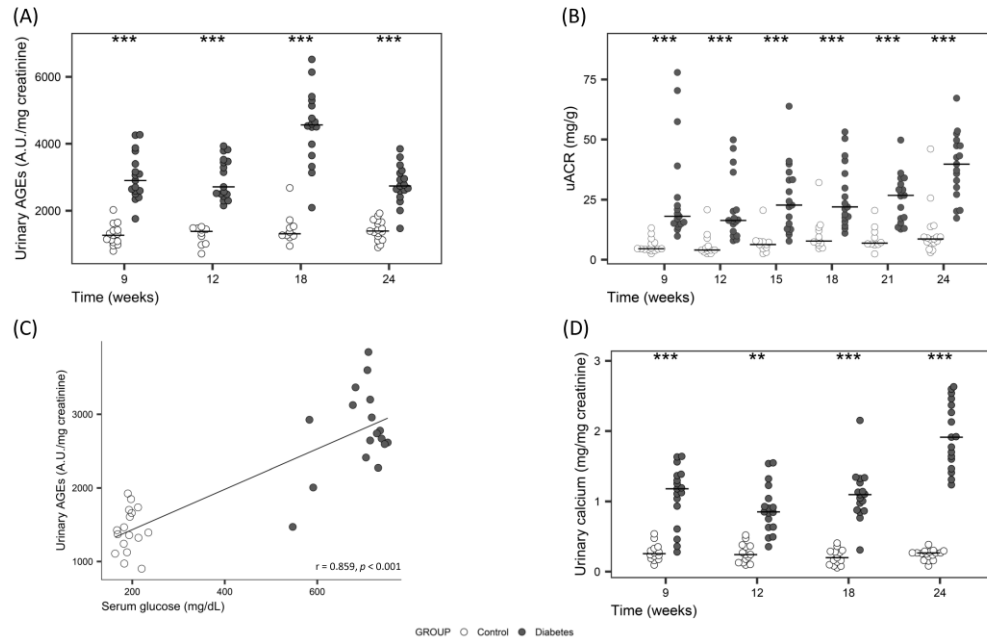

**Figure S1.** Time course of (A) urinary AGEs and (B) uACR in controls and diabetic rats. (C) Correlation between urinary AGEs and serum glucose adjustment for diabetes. (D) Time course of urinary calcium in controls and diabetic rats. uACR: urinary albumin/creatinine ratio; AGEs: advanced glycation end products. Non-parametric Wilcoxon rank sum test was used. Horizontal line represents median. \*\*  $p \leq 0.01$  vs. control, \*\*\*  $p < 0.001$  vs. control.
