# Supplementary material for: Role of Klotho and AGE/RAGE-Wnt/β-Catenin Signalling Pathway on the Development of Cardiac and Renal Fibrosis in Diabetes
Source: MDPI journal article supplement (doi:10.3390/ijms24065241), 2023-03-09
Supplement: s1 [file s1]

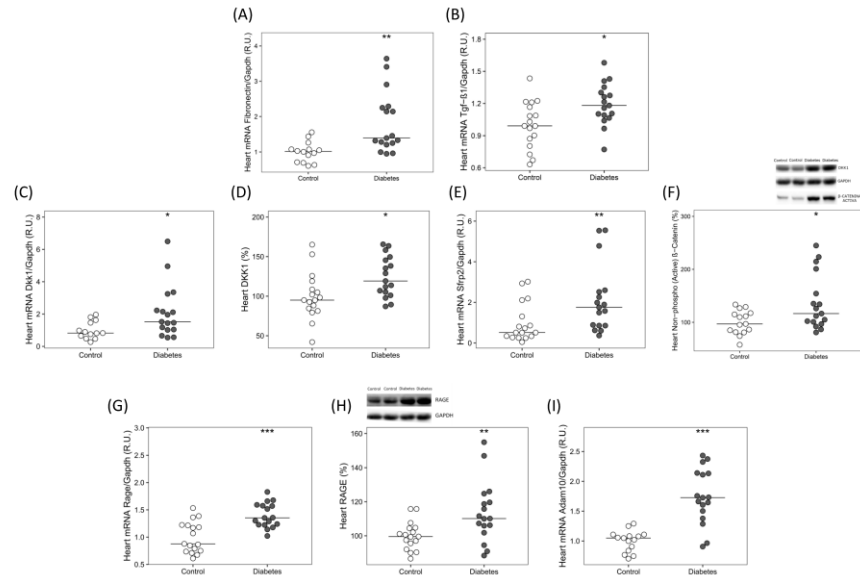

**Figure S4.** Heart gene expression of (A) Fibronectin; and (B) Tgf- $\beta$ 1. Wnt pathway markers: (C) Gene expression of Dkk1; and (D) Relative quantification and representative image of Western blot analysis of DKK1. (E) Gene expression of Sfrp2. (F) Relative quantification of Western blot analysis and representative image active  $\beta$ -catenin. (G) Gene expression of RAGE; (H) Relative quantification and representative image of Western blot analysis of RAGE; and (I) Gene expression of Adam10. R.U.: relative units. Non-parametric Wilcoxon rank sum test was used. Horizontal line represents median. \*  $p \leq 0.05$  vs. control, \*\*  $p \leq 0.01$  vs. control, \*\*\*  $p \leq 0.001$  vs. control.
