# Supplementary material for: Role of Klotho and AGE/RAGE-Wnt/β-Catenin Signalling Pathway on the Development of Cardiac and Renal Fibrosis in Diabetes
Source: MDPI journal article supplement (doi:10.3390/ijms24065241), 2023-03-09
Supplement: s1 [file s1]

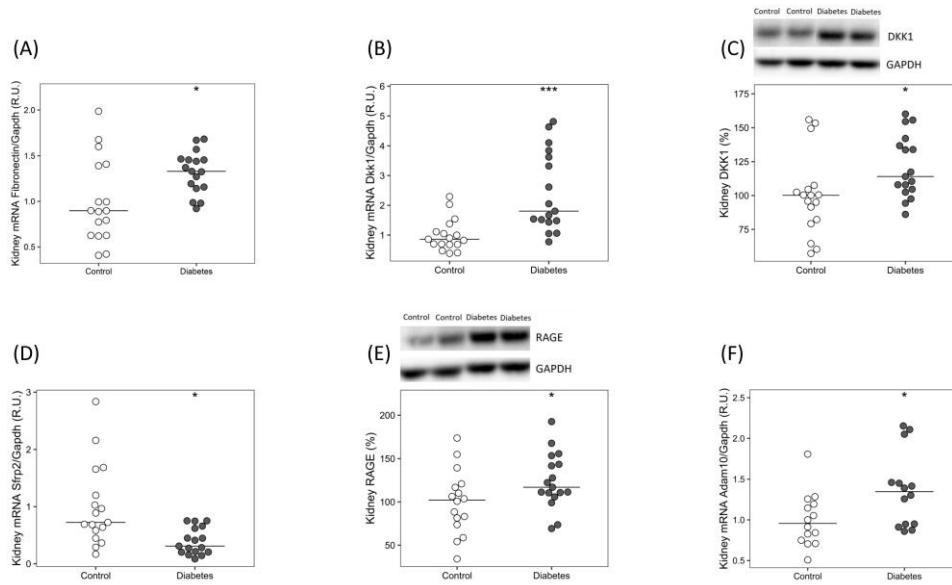

**Figure S3.** Kidney gene expression of (A) fibronectin. Wnt pathway markers: (B) Gene expression of Dkk1; (C) Relative quantification and representative image of Western blot analysis of DKK1; and (D) Gene expression of Sfrp2. (E) Relative quantification and representative images of Western blot analysis of RAGE. (F) Gene expression of Adam10. R.U.: relative units. Non-parametric Wilcoxon rank sum test was used. Horizontal line represents median. \*  $p \leq 0.05$  vs. control, \*\*\*  $p < 0.001$  vs. control.
